# Supplementary material
Source: publisher site journal article supplement (https://www.spandidos-publications.com/2612/downloadSupplementary)
Supplement: Supplementary file 1 [file downloadSupplementary]

## Sheet: Table SX
Table SX. Multivariate Cox proportional hazards regression of miR150 on patients' survival grouped by PR status.
Variable	PR negative				PR positive
	Na	Median (Q1-Q3)b	HR (95% CI)	P-valuec	Na	Median (Q1-Q3)b	HR (95% CI)	P-valuec
Overall survival
miR150 (continuous)	335		0.73 (0.55-0.96)	0.024	687		0.70 (0.51-0.95)	0.021
miR150 (categorical)d
Low	198	19.76 (11.80-46.31)	Reference		492	24.73 (15.14-51.35)	Reference
High	137	37.98 (19.19-74.84)	0.24 (0.07-0.83)	0.025	195	39.13 (19.20-71.94)	0.28 (0.06-1.30)	0.104
Disease-free survival
miR150 (continuous)	310		0.80 (0.59-1.09)	0.161	628		0.71 (0.54-0.94)	0.018
miR150 (categorical)d
Low	183	17.87 (10.28-38.09)	Reference		443	22.44 (14.25-43.06)	Reference
High	127	34.00 (17.37-74.46)	0.33 (0.08-1.32)	0.117	185	36.17 (18.89-68.69)	0.51 (0.16-1.66)	0.264
a Number of samples, some of these variables have missing values.
b Data were shown as median (Q1-Q3 quantiles) overall or disease-free survival months.
c P-values were adjusted for diagnosis age, ER status, HER2 status, copy number alterations, lymph nodes examined number, mutation count and stage.
d Low: miR150 <9.55, High: miR150 ≥9.55.
